# Supplementary material for: Single crystalline La0.5Sr0.5MnO3microcubes as cathode of solid oxidefuel cell
Source: Royal Society of Chemistry journal article supplement (doi:10.1039/c0ee00300j), 2010-11-03
Supplement: c0ee00300j.pdf [file c0ee00300j.pdf]

## Electronic Supplementary Information

### Single Crystalline $\text{La}_{0.5}\text{Sr}_{0.5}\text{MnO}_3$ Microcubes as Cathode of Solid Oxide Fuel Cell

Mingjia Zhi<sup>1,2</sup>, Guangwen Zhou<sup>3</sup>, Zhanglian Hong<sup>4</sup>, Jin Wang<sup>1,2</sup>, Randall Gemmen<sup>1</sup>, Kirk Gerdes<sup>1</sup>, Ayyakkannu Manivannan<sup>1,2</sup>, Dongling Ma<sup>5</sup> and Nianqiang Wu<sup>1,2,\*</sup>

<sup>1</sup>National Energy Technology Laboratory, Department of Energy, 3610 Collins Ferry Road, Morgantown, WV, 26507, USA

<sup>2</sup>Department of Mechanical and Aerospace Engineering, West Virginia University, Morgantown, WV, 26506-6106, USA

<sup>3</sup>Department of Mechanical Engineering, Binghamton University, Binghamton, NY, 13902, USA

<sup>4</sup>State Key laboratory of Silicon Materials and Department of Materials Science and Engineering, Zhejiang University, Hangzhou 310027, P. R. China

<sup>5</sup>Institut National de la Recherche Scientifique, INRS-Énergie, Matériaux et Télécommunications, 1650 Boulevard Lionel-Boulet, Varennes, Québec J3X 1S2, Canada

\*Corresponding author: E-mail: [nick.wu@mail.wvu.edu](mailto:nick.wu@mail.wvu.edu), Tel: +1-(304)-293-3326, Fax: +1-(304)-293-6689

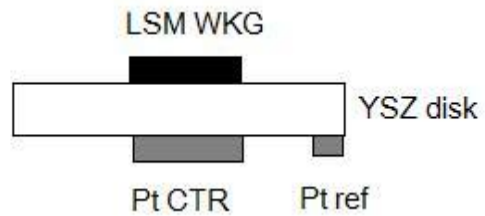

**Fig.S1** Schematic illustration of the SOFC half cell

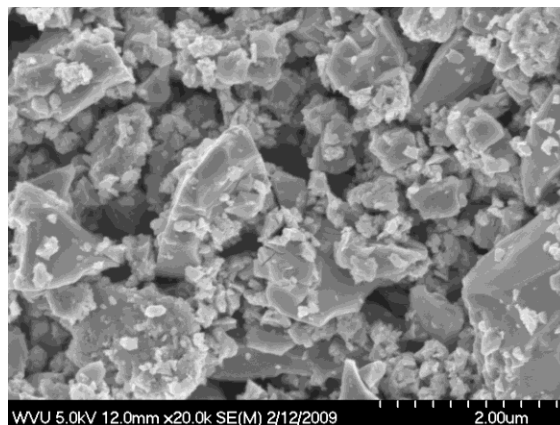

**Fig.S2** SEM image of the commercial LSM powder

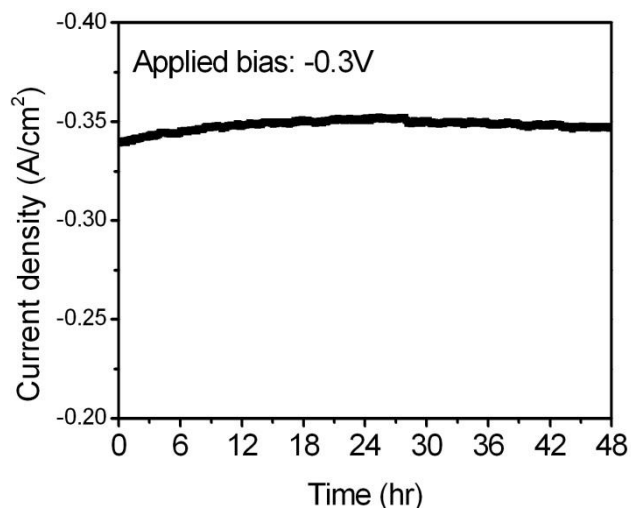

**Fig.S3** The electric current density as a function of the operating time for the LSM microcube/YSZ composite electrode at 900 °C

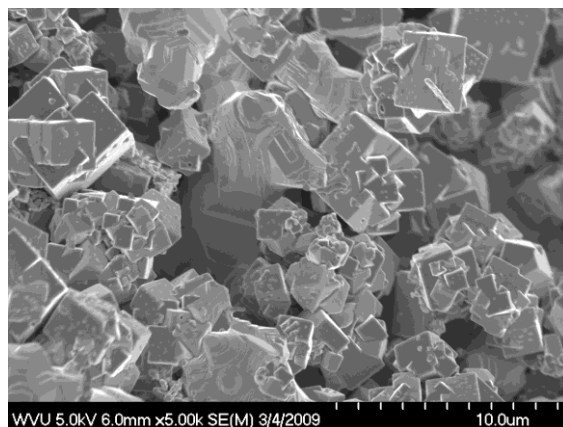

**Fig.S4** The morphology of the LSM microcubes after operation at 900 °C for 48 h
